# Supplementary material for: Stretchable and compressible strain sensors based on carbon nanotube meshes
Source: Royal Society of Chemistry journal article supplement (doi:10.1039/c6nr06804a), 2016-01-01
Supplement: c6nr06804a1.pdf [file c6nr06804a1.pdf]

## Supporting Information

### Stretchable and compressible strain sensors basing on carbon nanotube meshes

*Fengmei Guo, Xian Cui, Kunlin Wang, Jinquan Wei\**

*Key Lab for Advanced Materials Processing Technology of Education Ministry; State Key Lab of  
New Ceramic and Fine Processing; School of Materials Science and Engineering, Tsinghua  
University, Beijing 100084, P.R. China*

\*E-mail: [jqwei@tsinghua.edu.cn](mailto:jqwei@tsinghua.edu.cn)

**This file includes Figs. S1 to S10.**

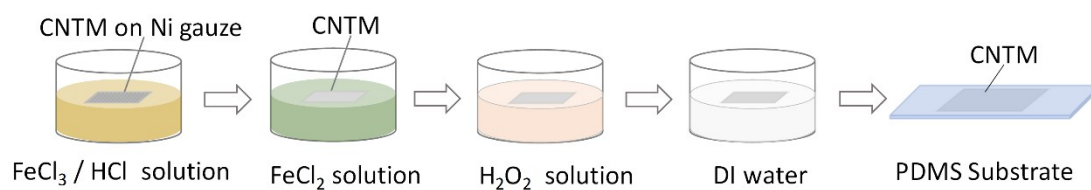

**Figure S1.** Schematic diagram of preparation of CNT meshes and stretchable CNTM strain sensors.

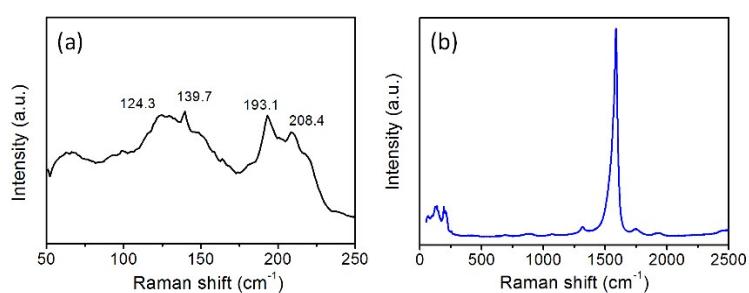

**Figure S2.** Raman spectrum of the CNT mesh. (a) Radial breathing mode, (b) full spectrum from 0 to 2500  $\text{cm}^{-1}$ . There are RBM at 124.3, 139.7, 193.1, 208.4  $\text{cm}^{-1}$ , corresponding to CNTs with diameter of 1.8 nm, 1.6 nm, 1.16 nm and 1.07 nm, respectively. The Raman spectrum of the CNTM shows that the samples contain mainly single- and double-walled CNTs.

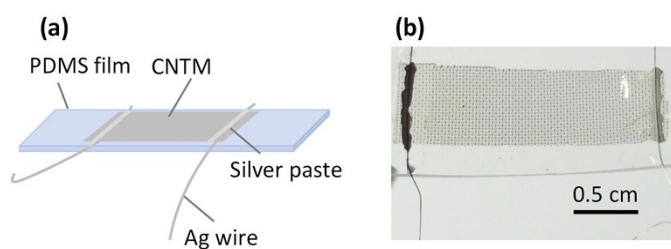

**Figure S3.** (a) Structure and optical (b) image of the stretchable CNTM strain sensor.

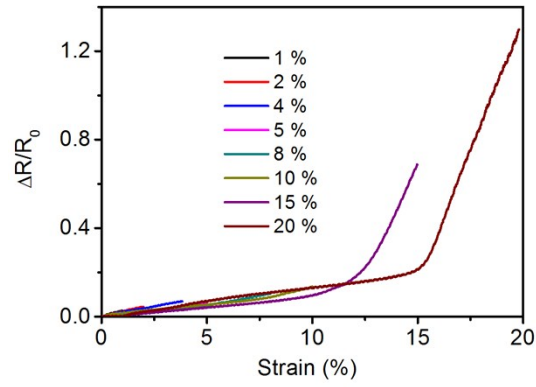

**Figure S4.** Plots of relative change in resistance of a stretchable CNTM strain sensor depending on strains.

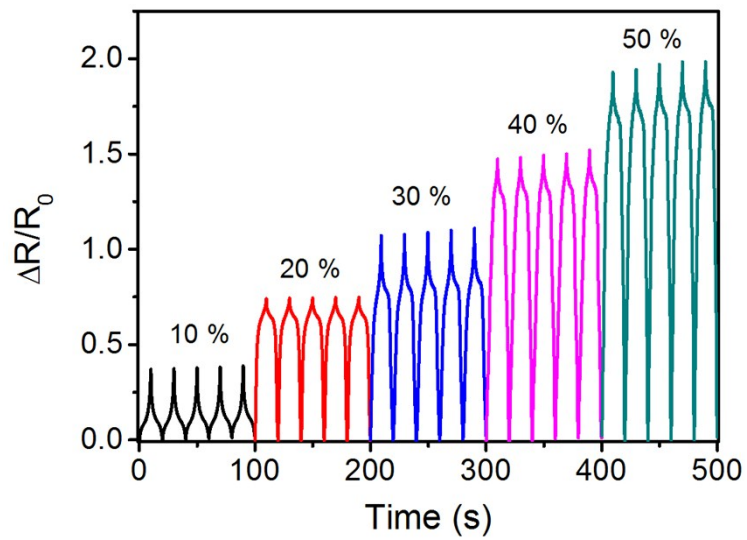

**Figure S5.** Measurement of the relative change in resistance to large stretching strains from 10% to 50% for 5 cycles.

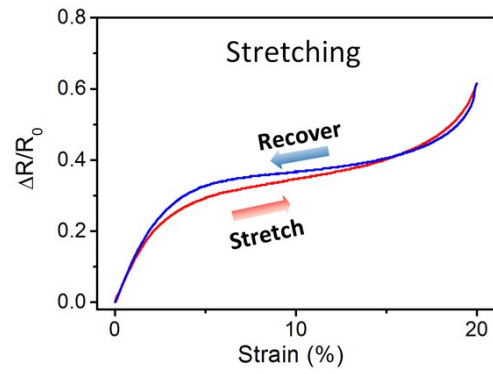

**Figure S6.** Plots of  $\Delta R/R_0$  versus strain during the stretching and recovering processes. It shows that the stretchable CNTM strain sensor has slight hysteresis which derives from creep characteristics of the PDMS substrate.

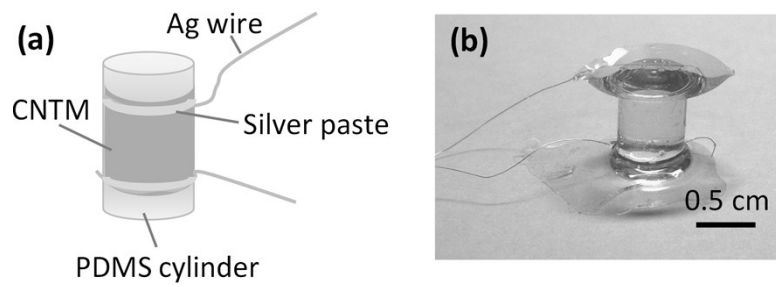

**Figure S7.** (a) Structure and (b) optical image of the compressible CNTM strain sensor.

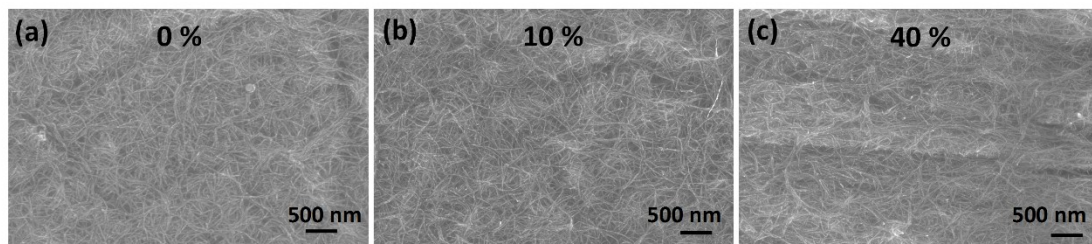

**Figure S8.** SEM images of a compressible CNTM strain sensor being compressed to various strains. (a) 0%, (b) 10%, (c) 40%.

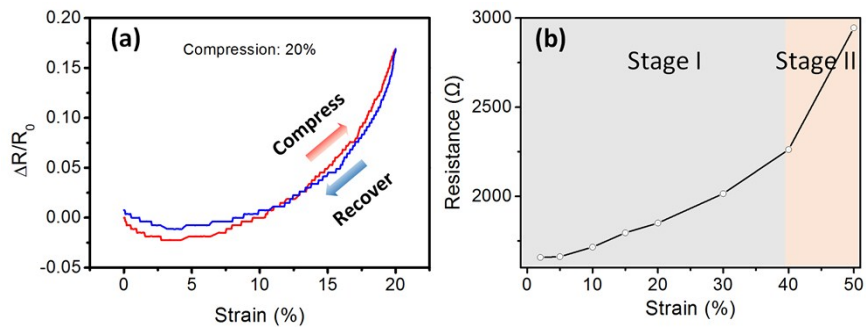

**Figure S9.** (a) Plots of  $\Delta R/R_0$  versus strain during the compressing and recovering processes. It shows that the compressible CNTM strain sensor also has slight hysteresis. (b) The dependence of resistance of a compressible sensor on the strain.

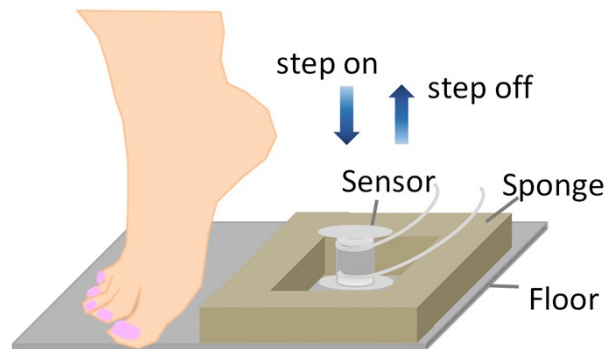

**Figure S10.** Schematic illustration of walking (running) on the compressible strain sensor.
